# Supplementary material for: Synthesis and Biological Evaluation of Prodrugs For Nitroreductase Based 4-β-Amino-4'-Demethylepipodophyllotoxin As Potential Anticancer Agents
Source: Research Square preprint supplement (doi:10.21203/rs.3.rs-1158885/v1), 2021-12-22

**Supplementary material**

**Synthesis and biological evaluation of prodrugs for nitroreductase based** **4-β-amino-4'-Demethylepipodophyllotoxin as potential anticancer agents**

Zheng-Rong Wu, WeiDeng, Dian He*

School of Pharmacy, Lanzhou University, Lanzhou 730000, People’s Republic of China


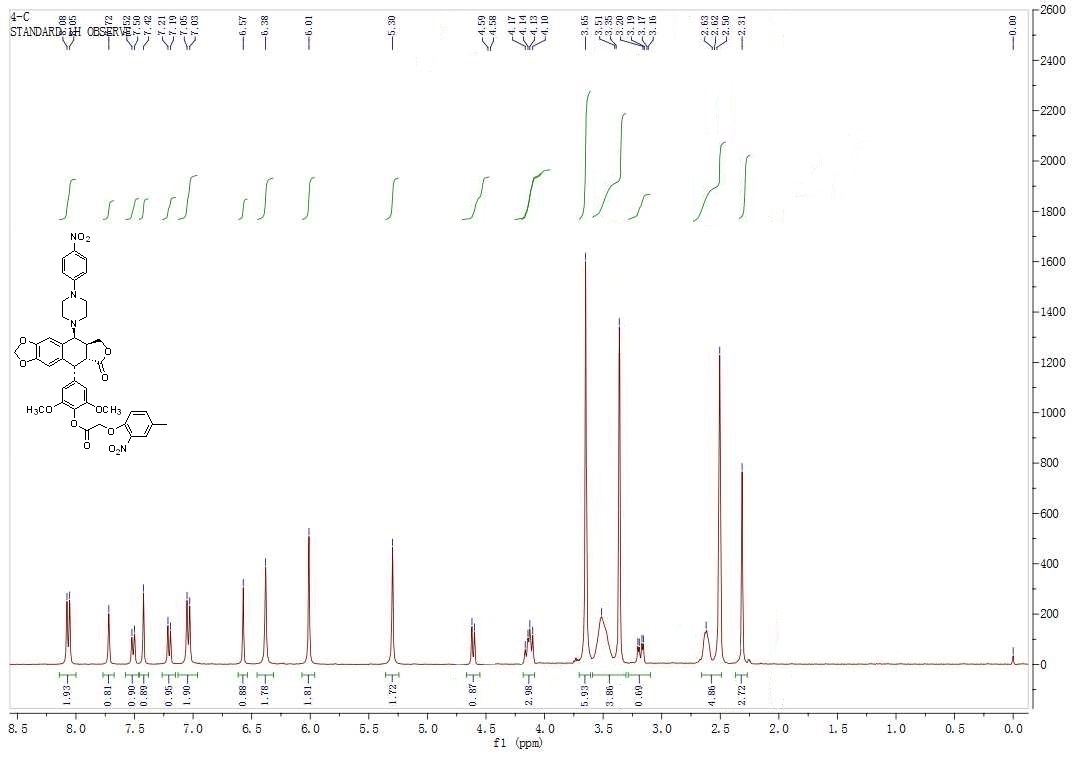


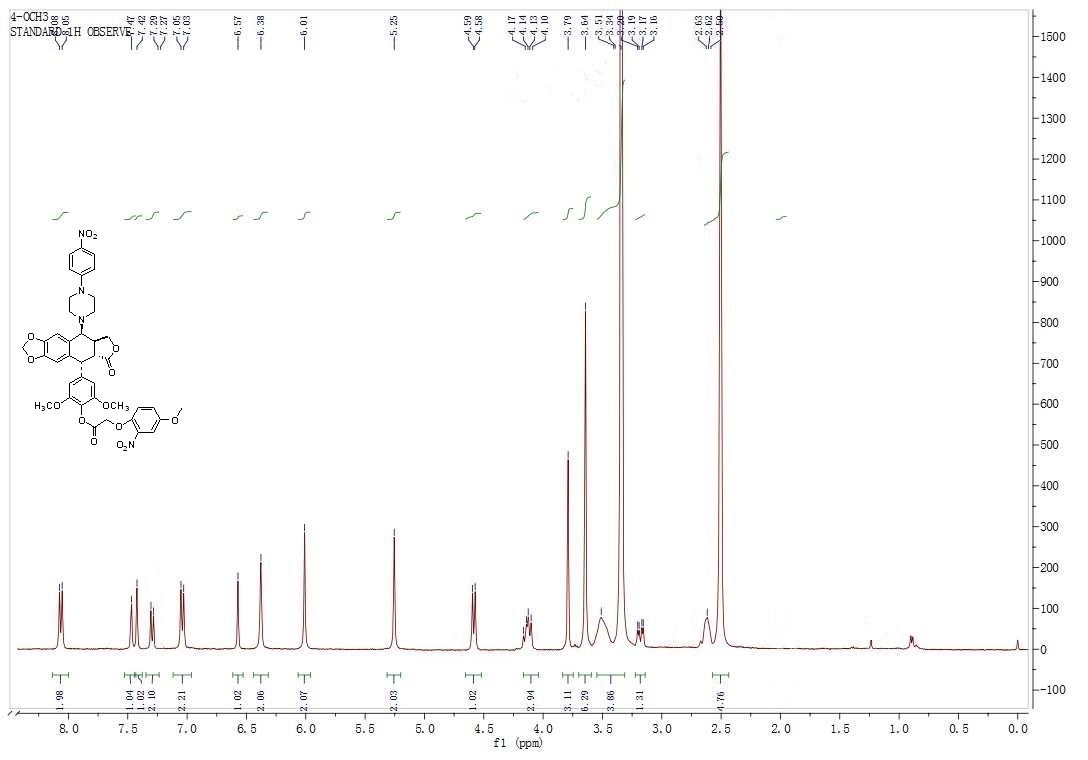


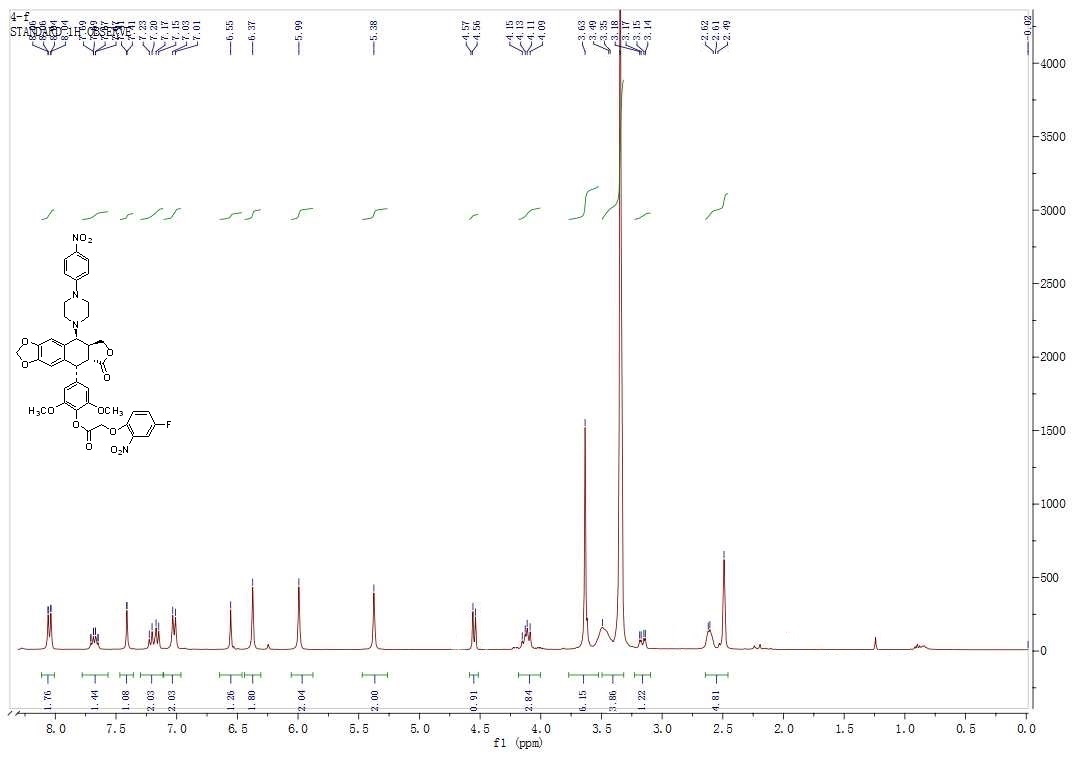


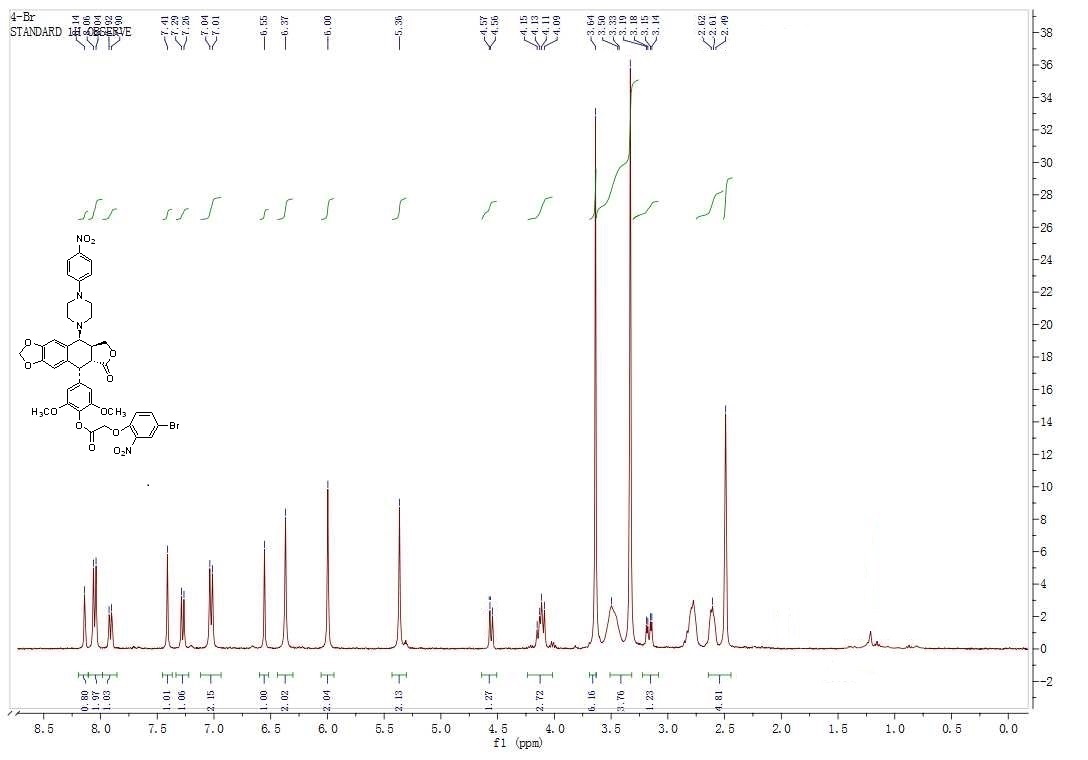


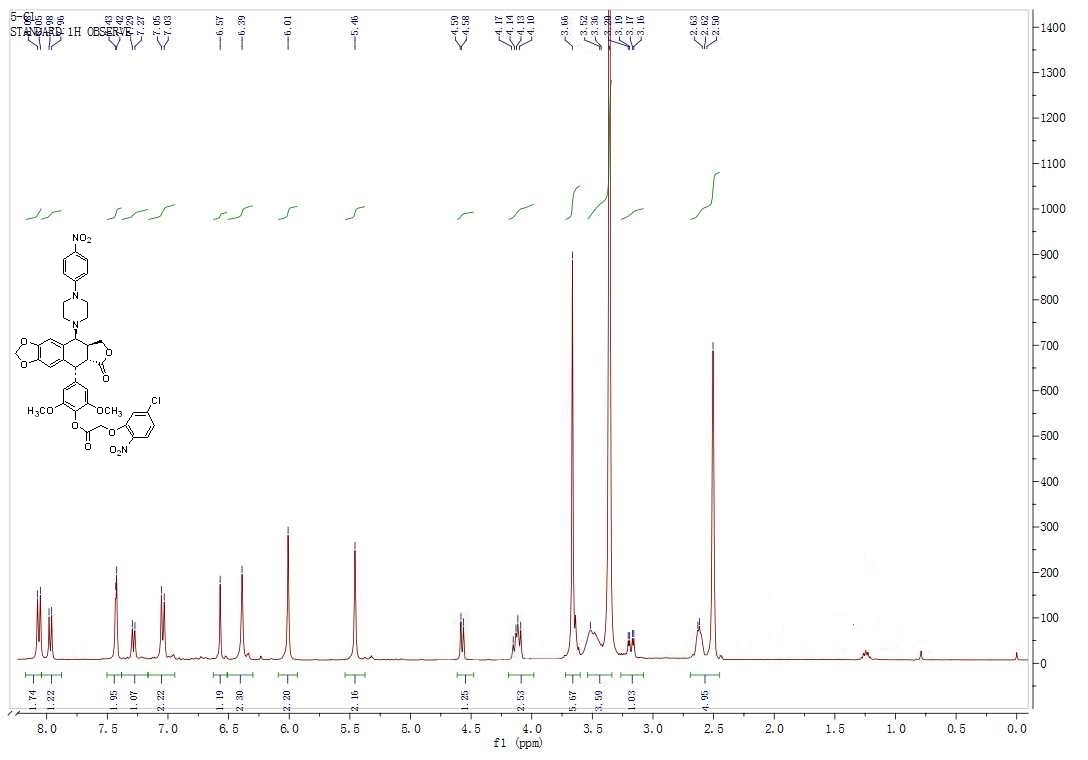


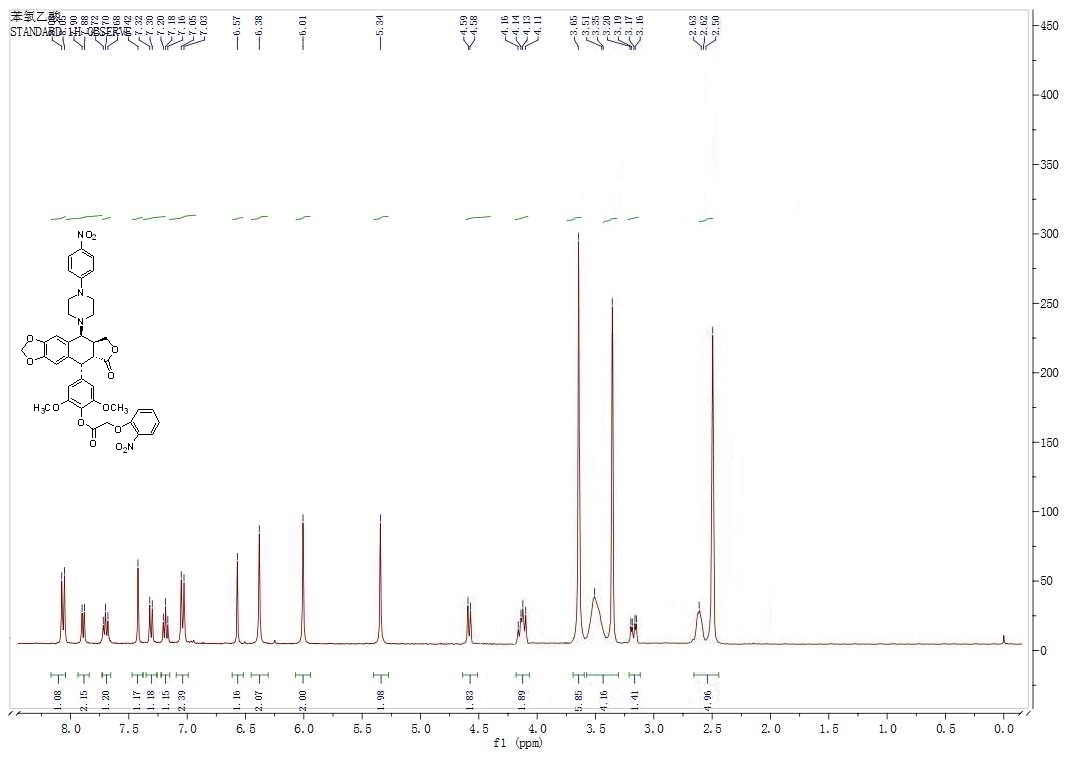


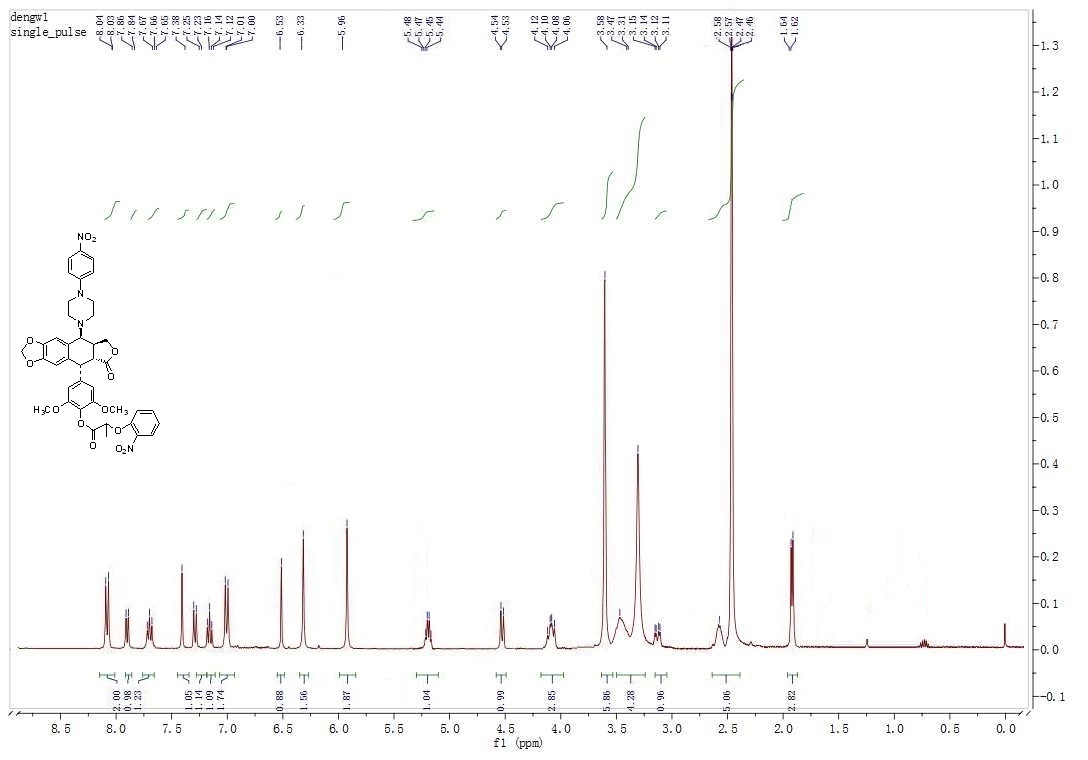


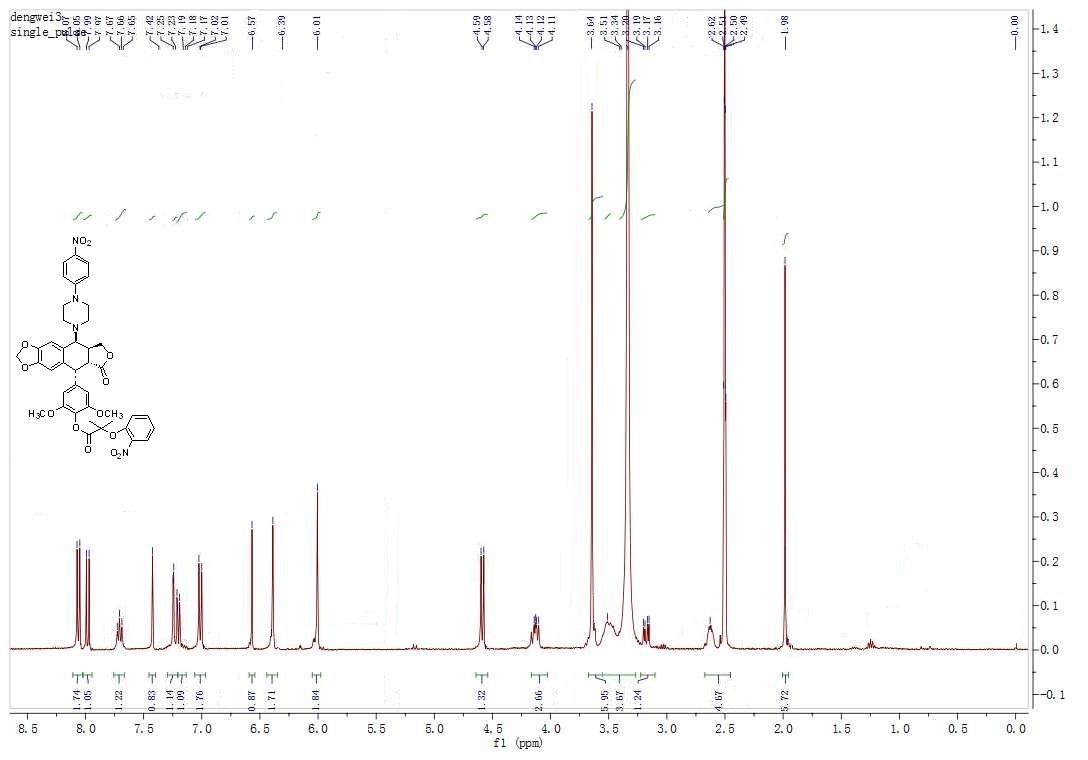


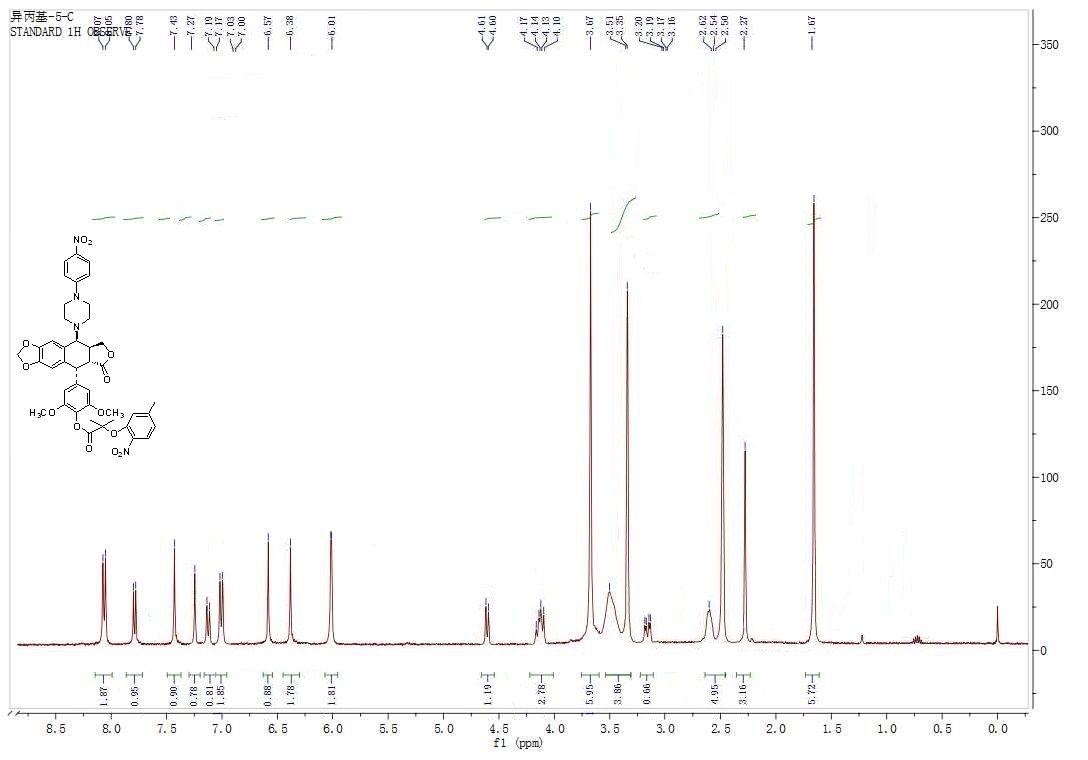


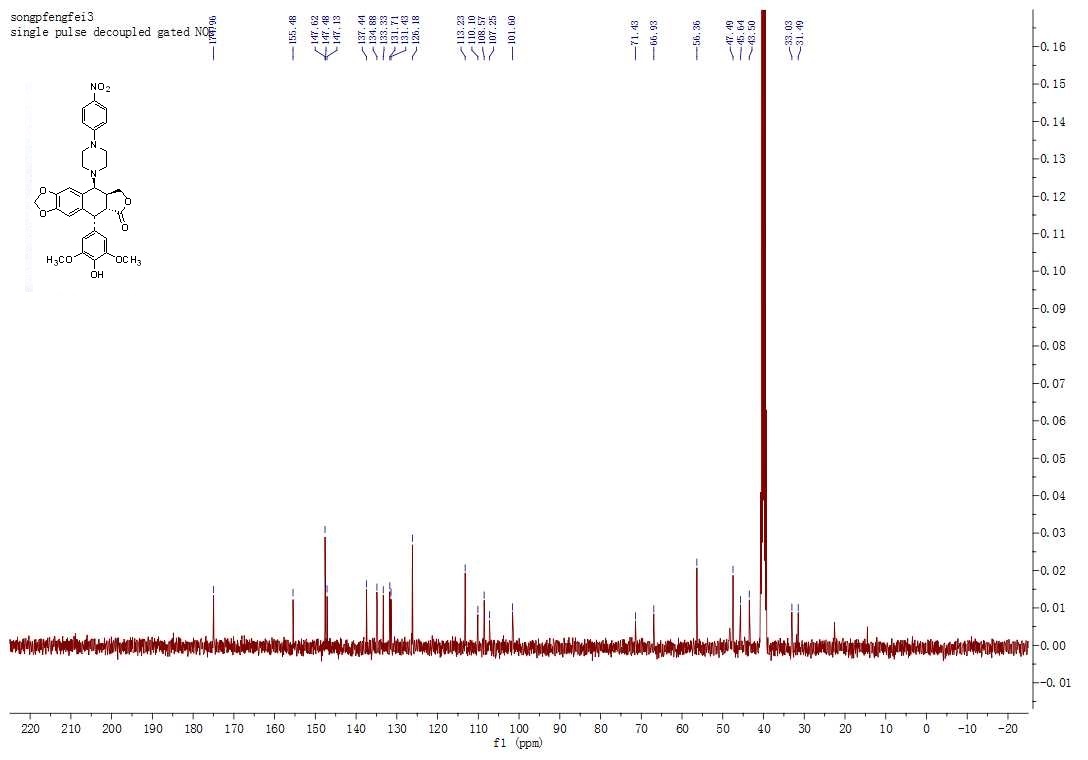


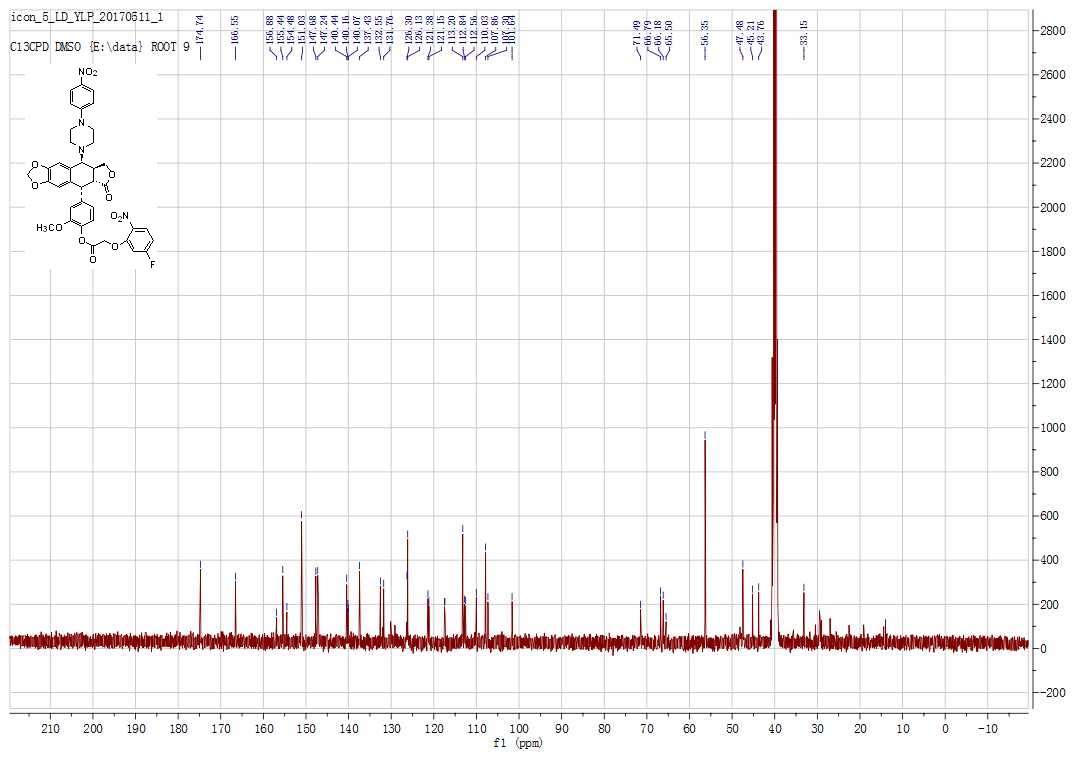


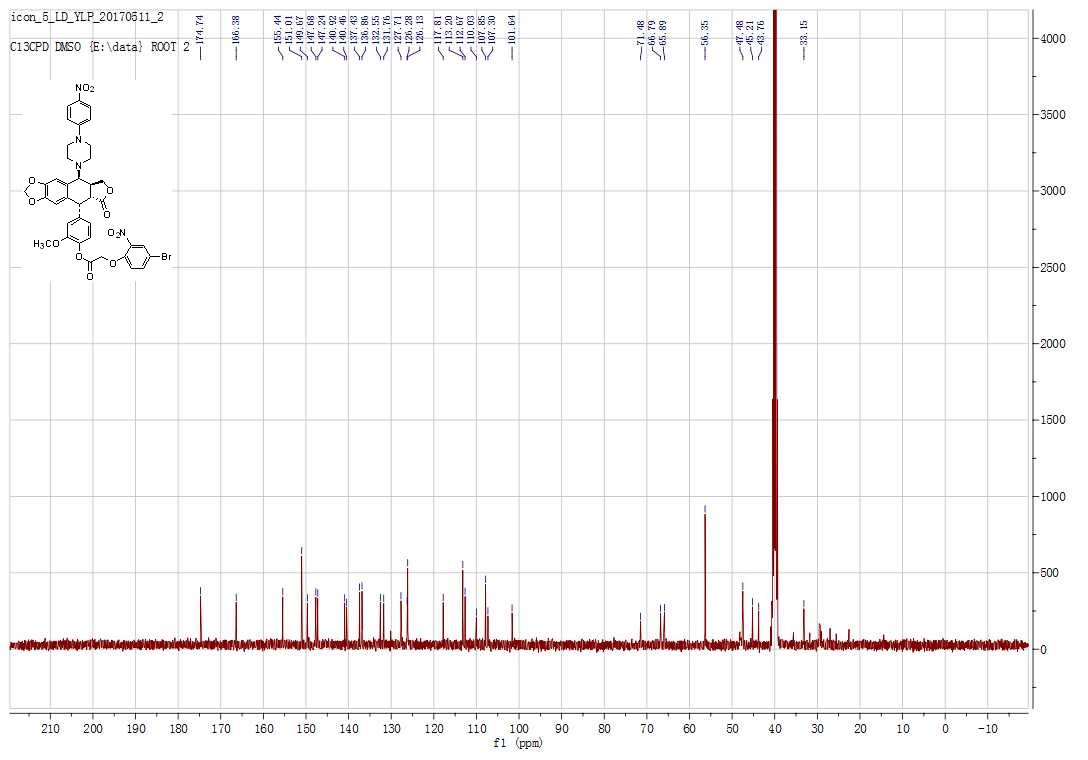


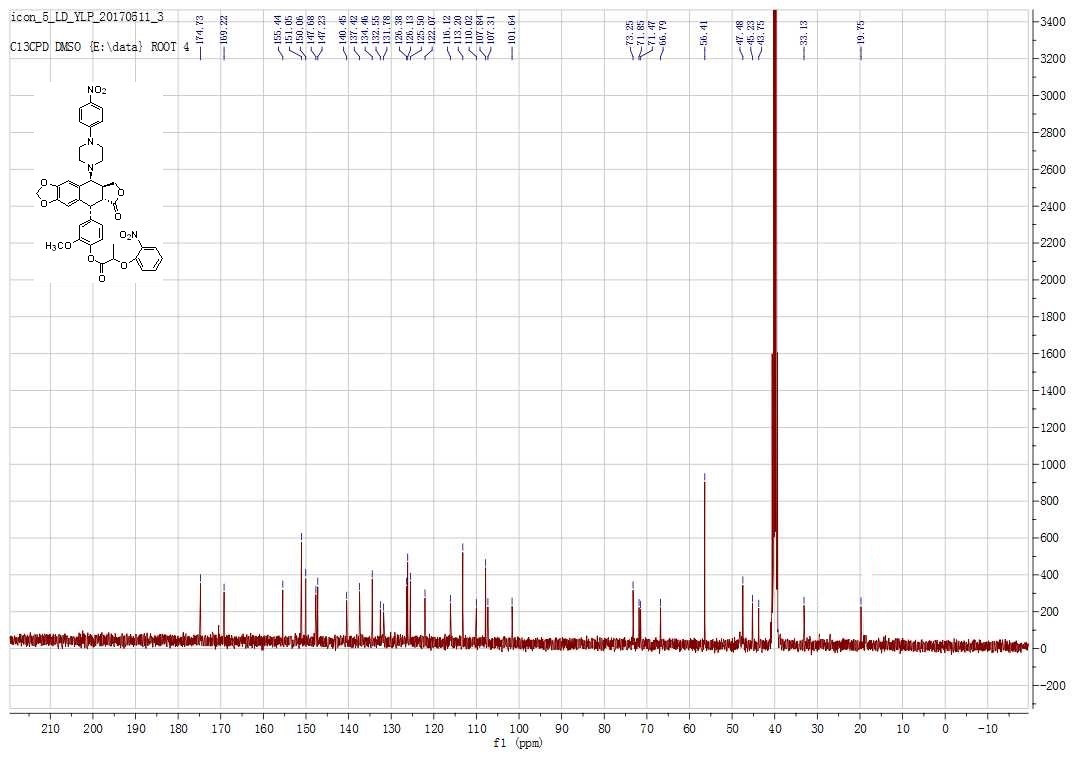


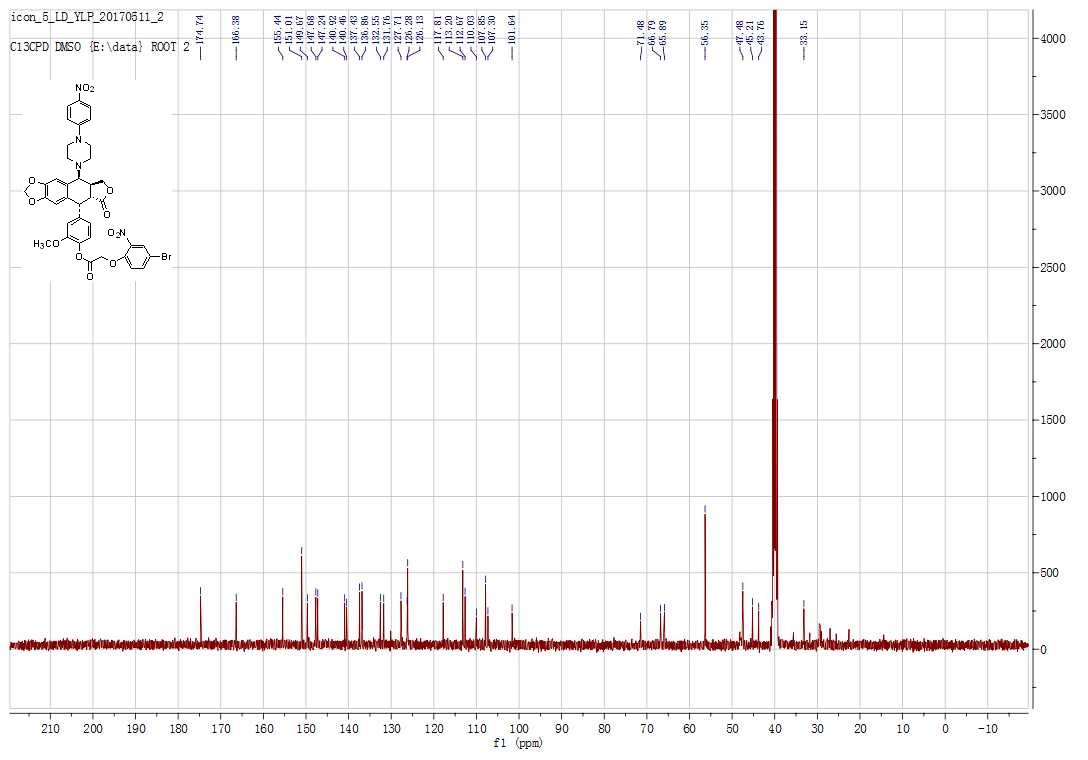

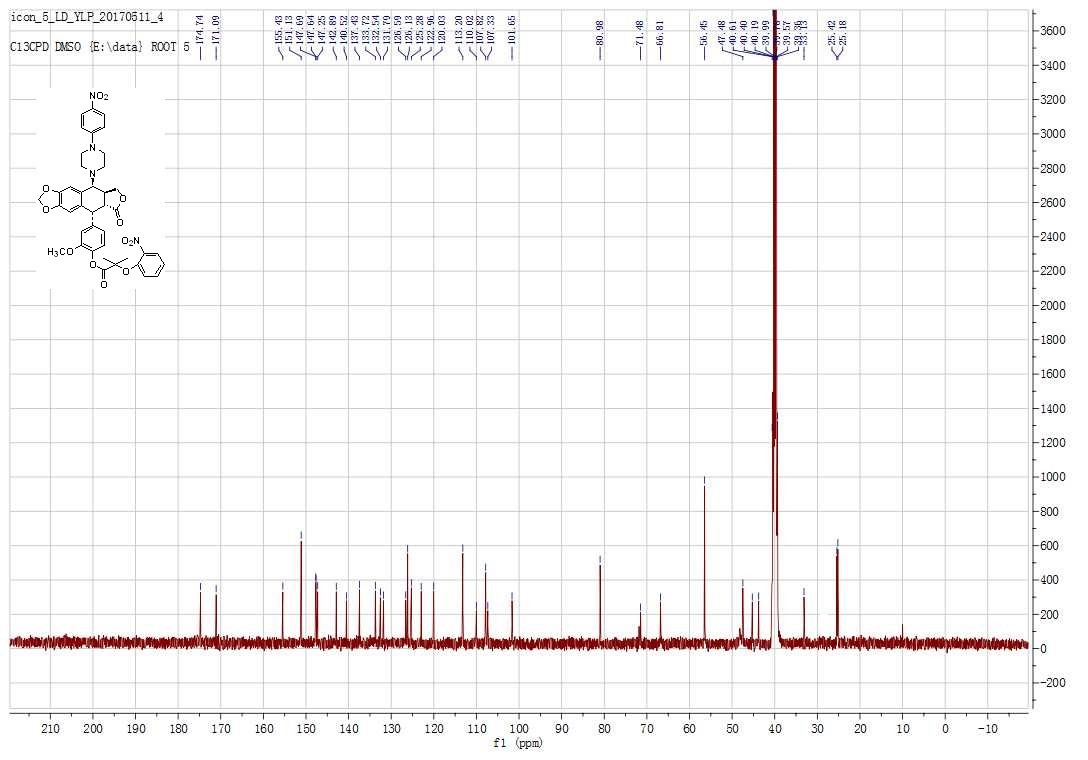


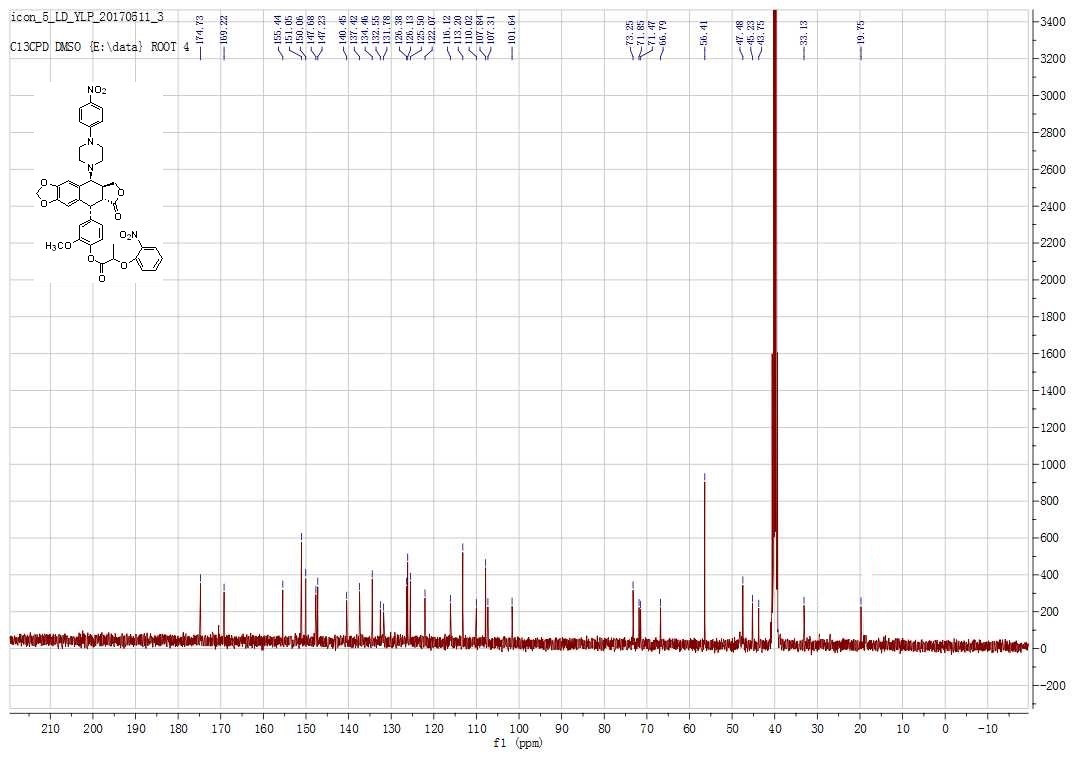

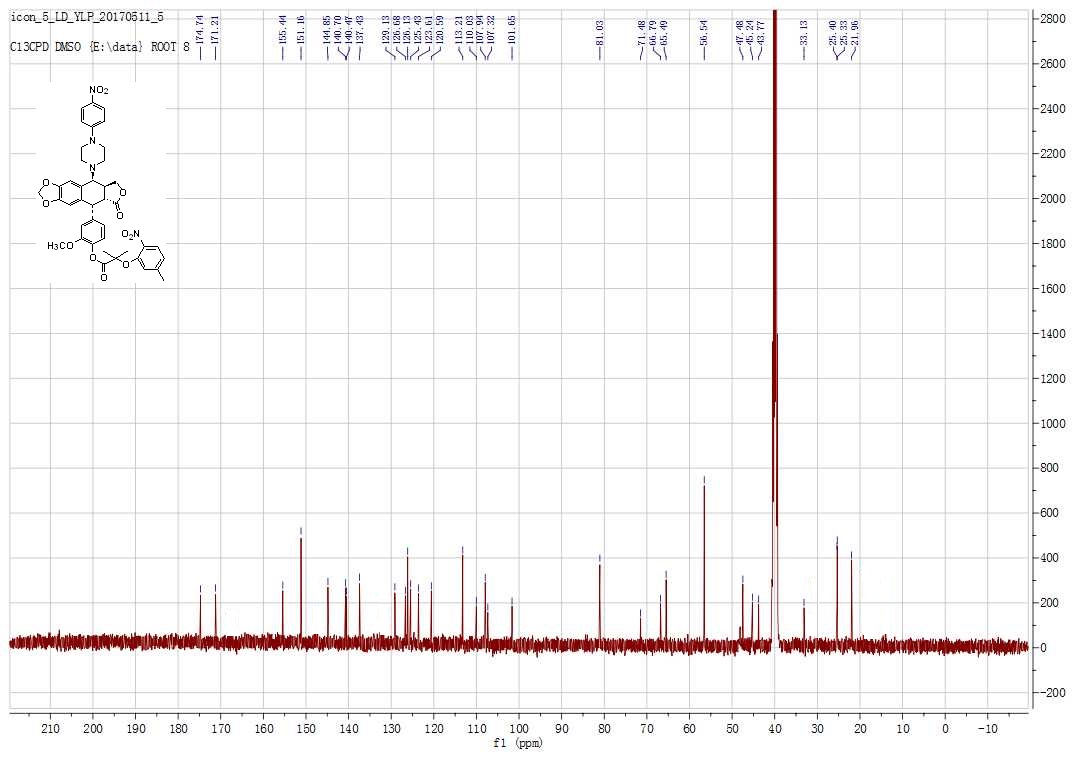


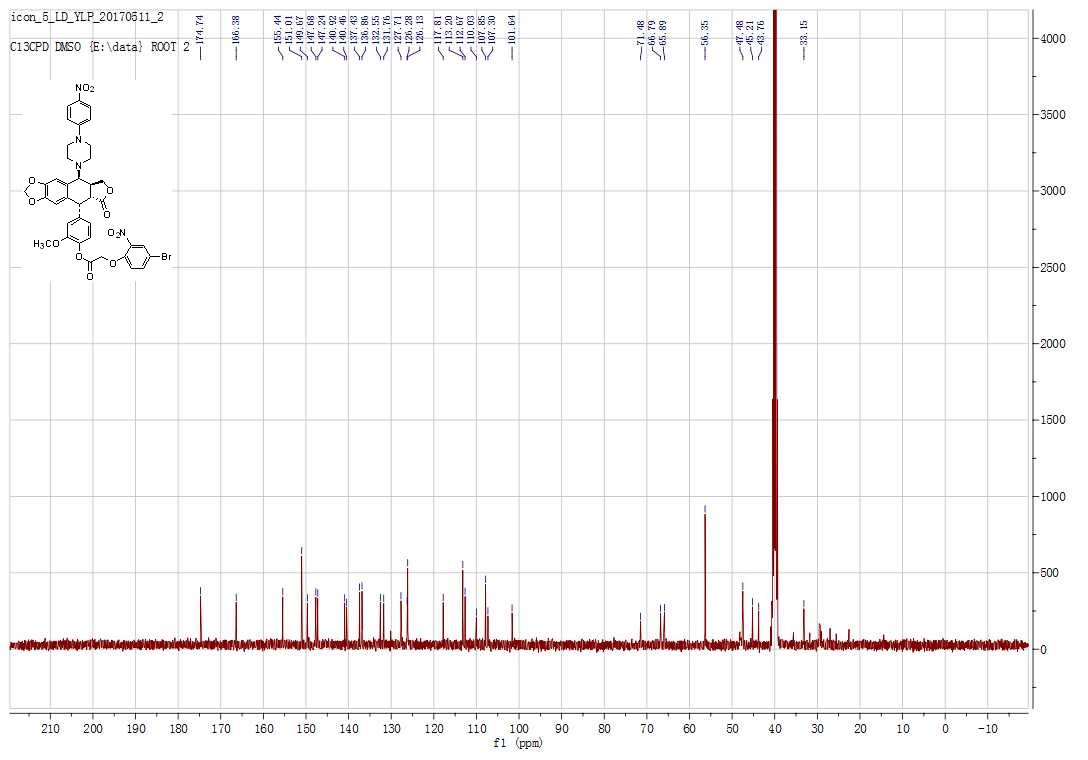

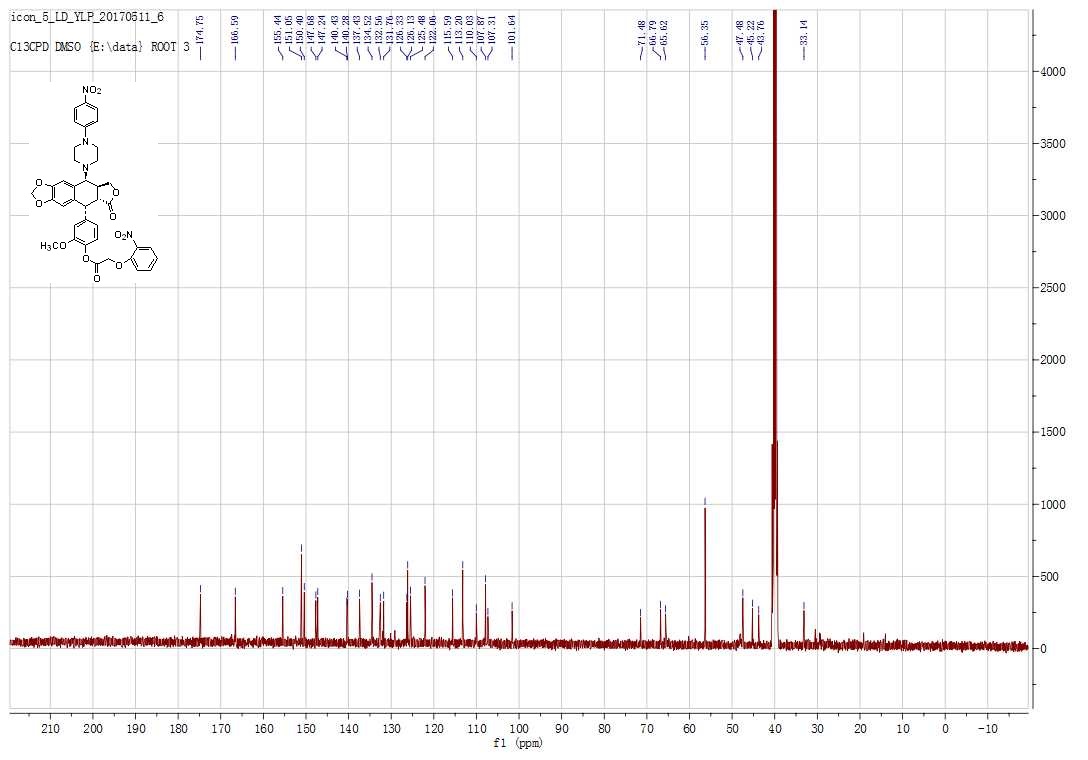


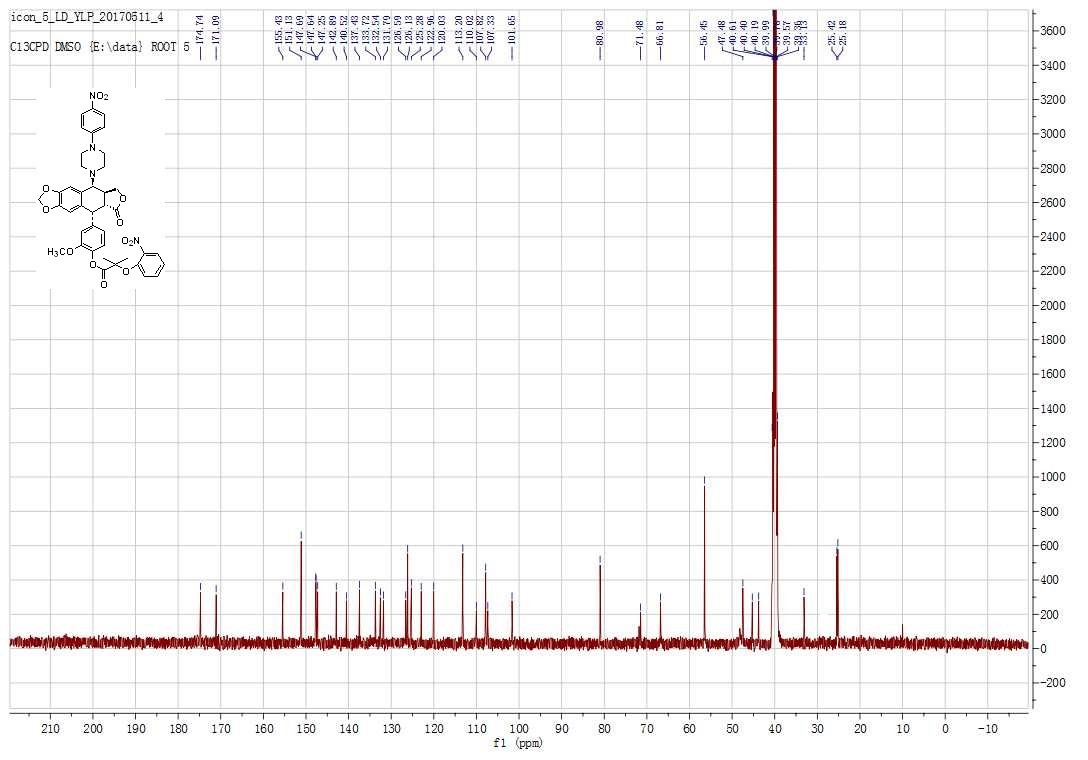


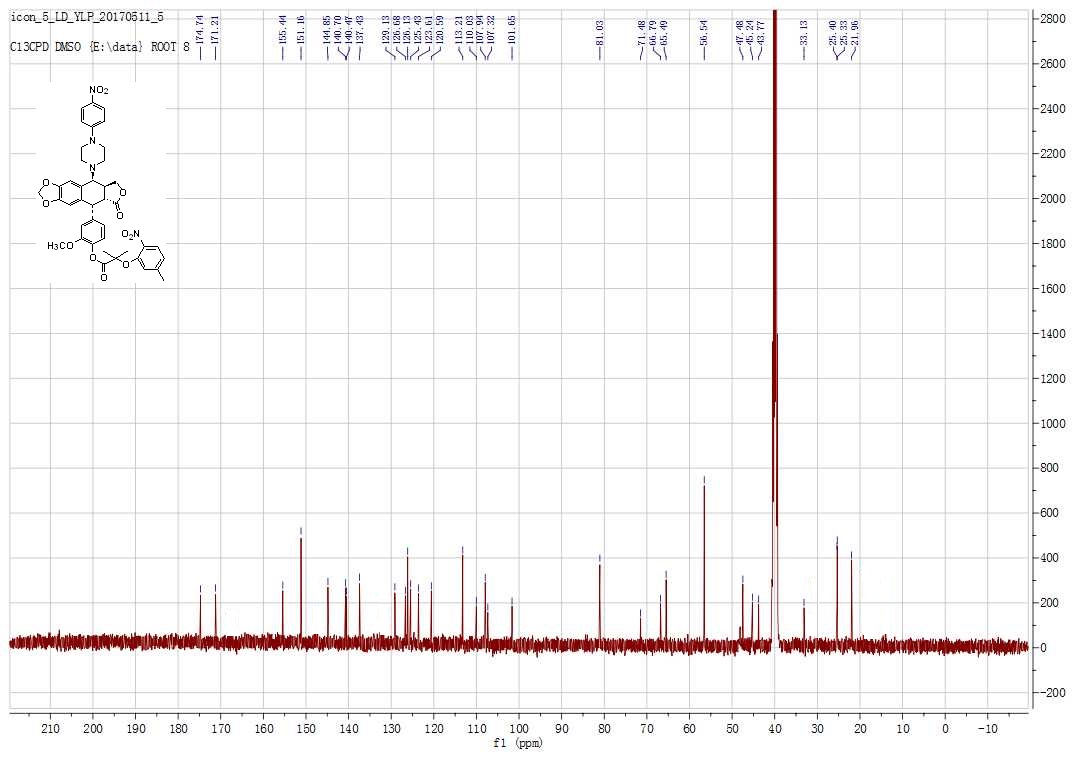

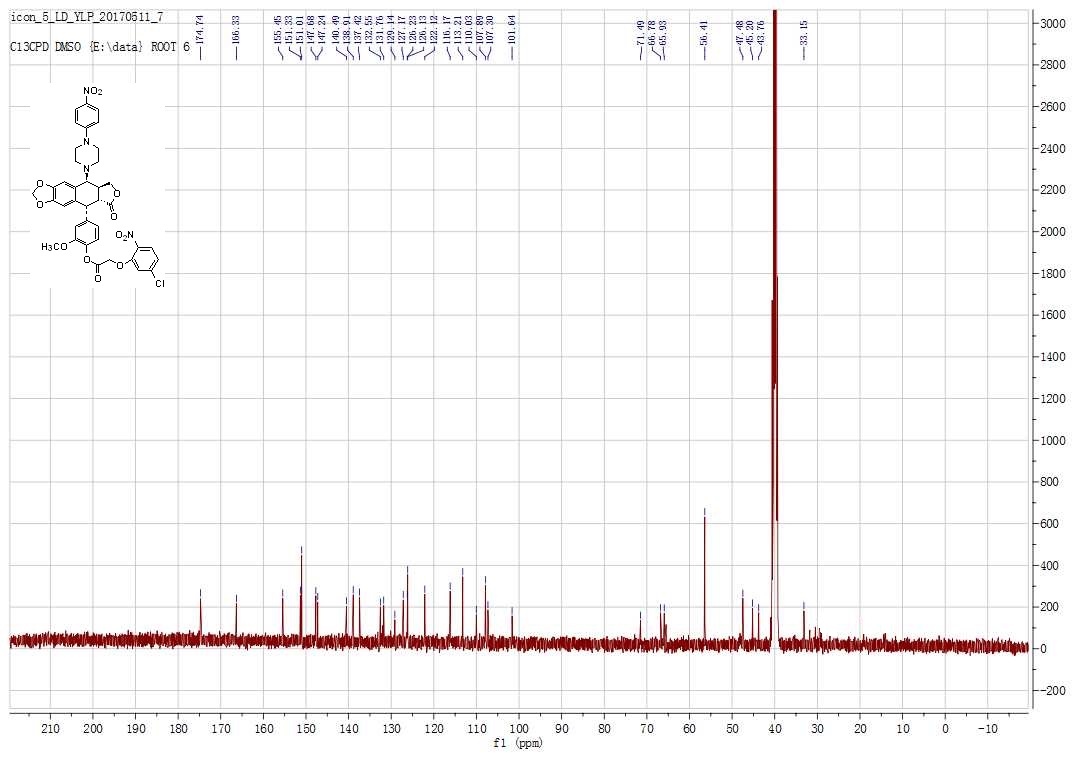

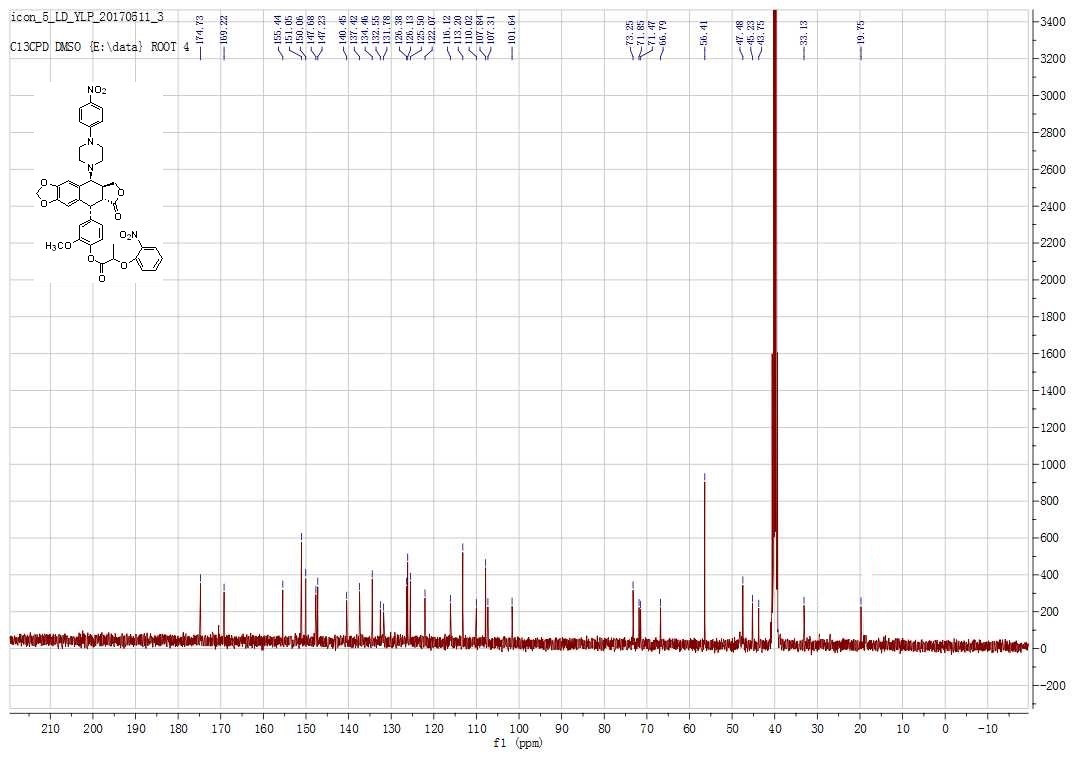


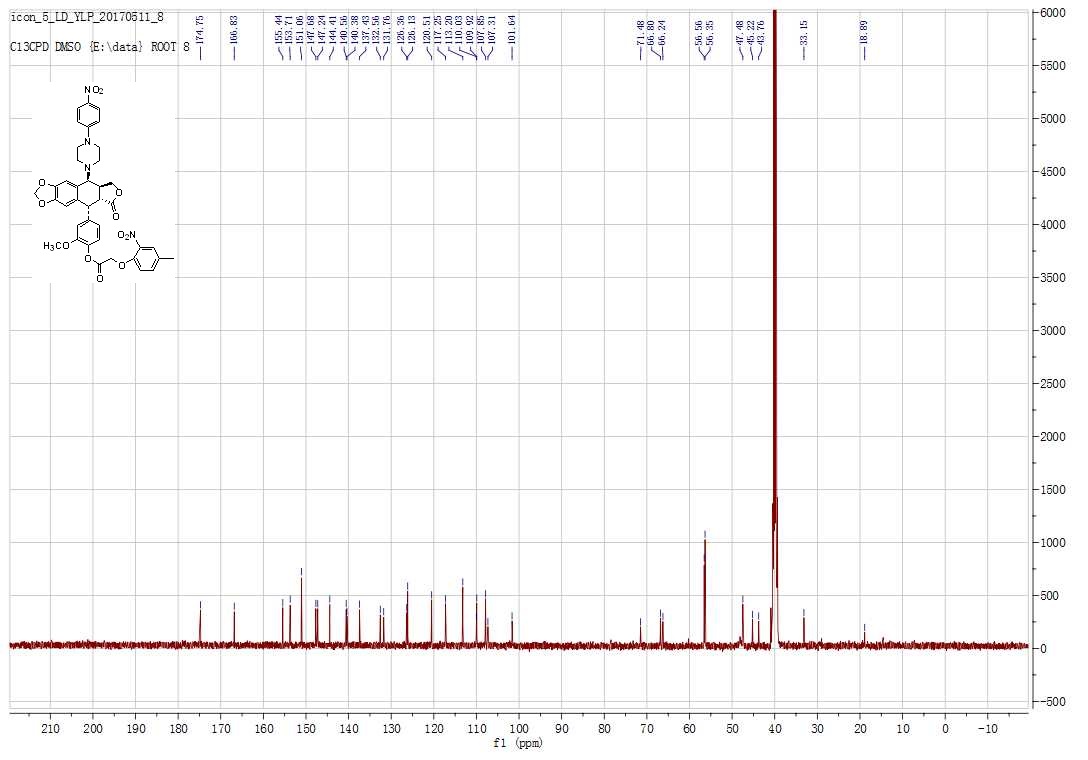


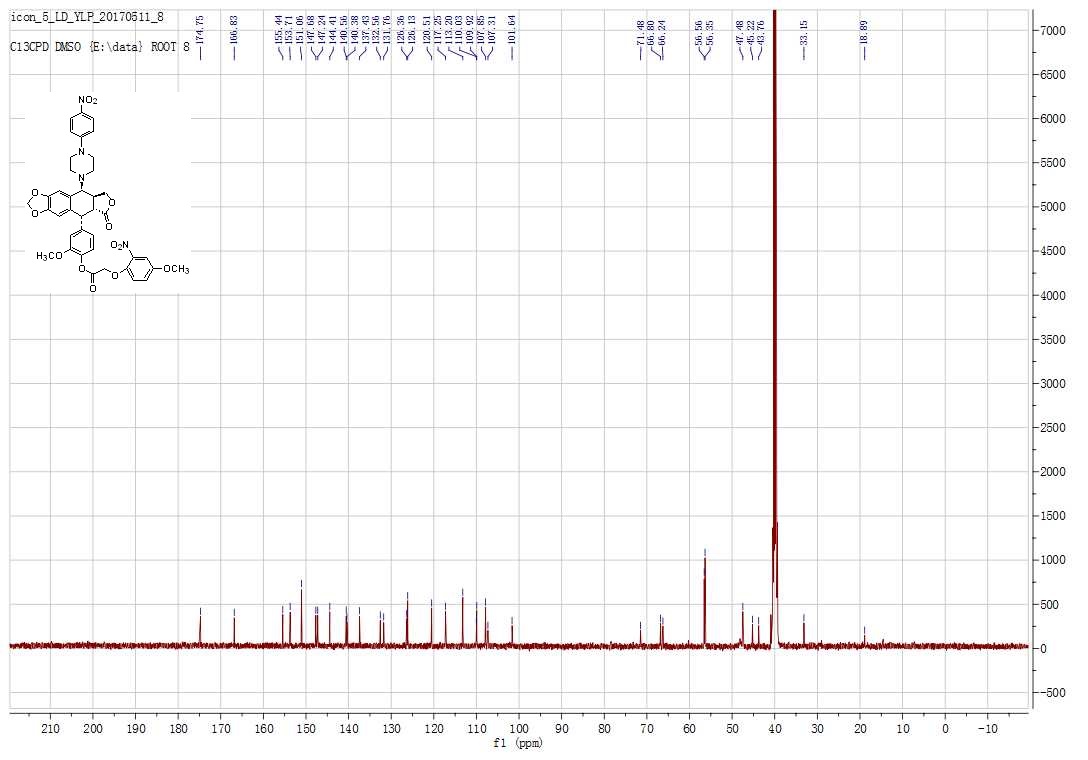


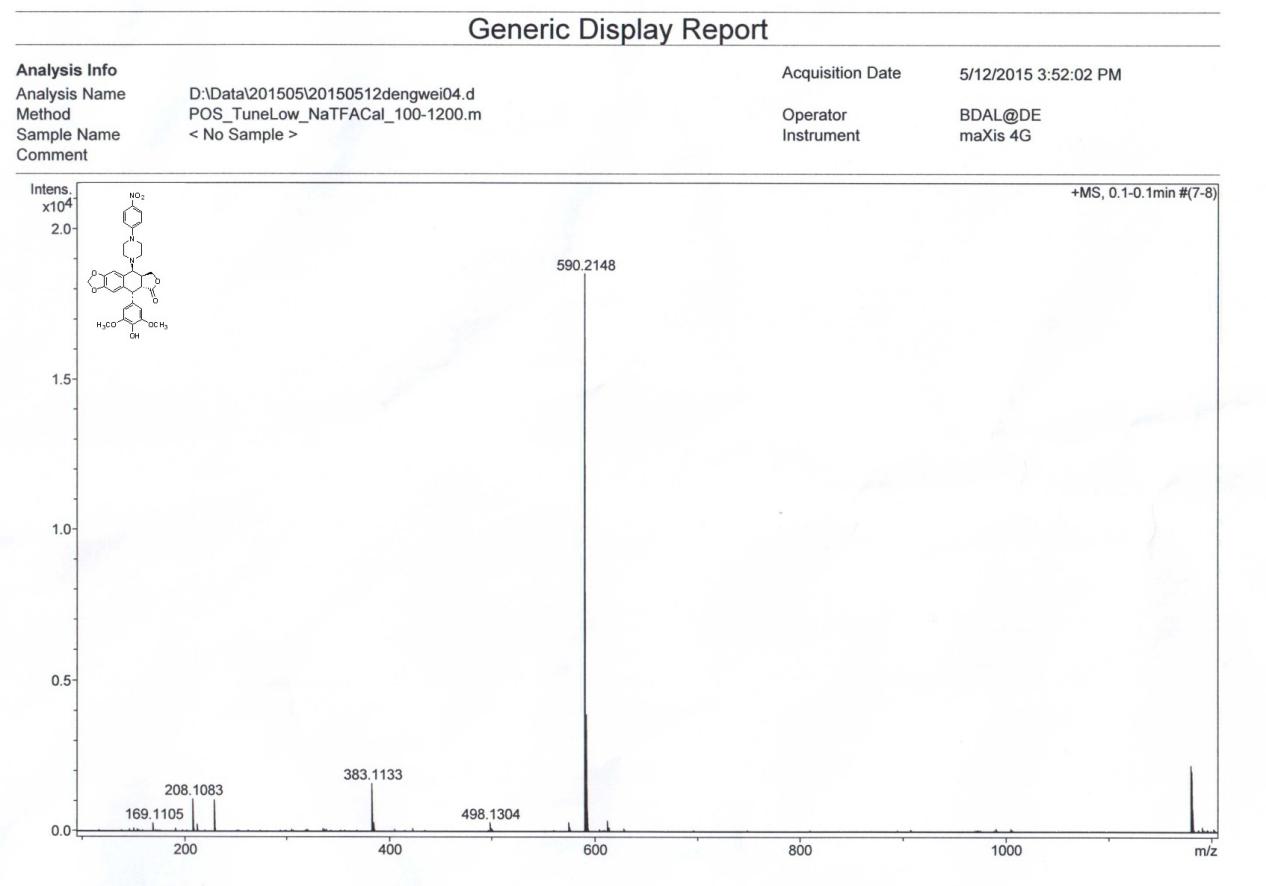


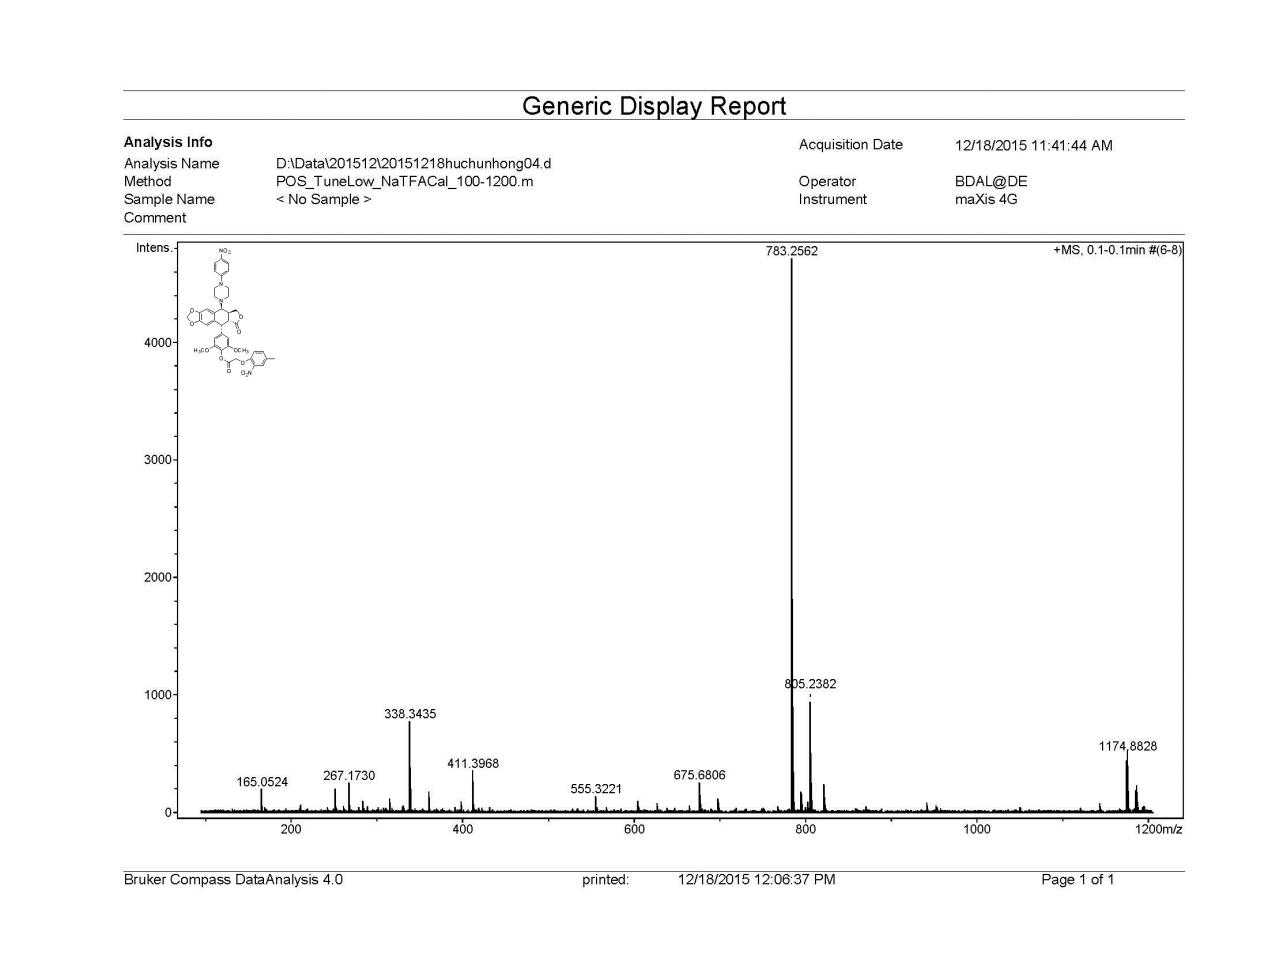


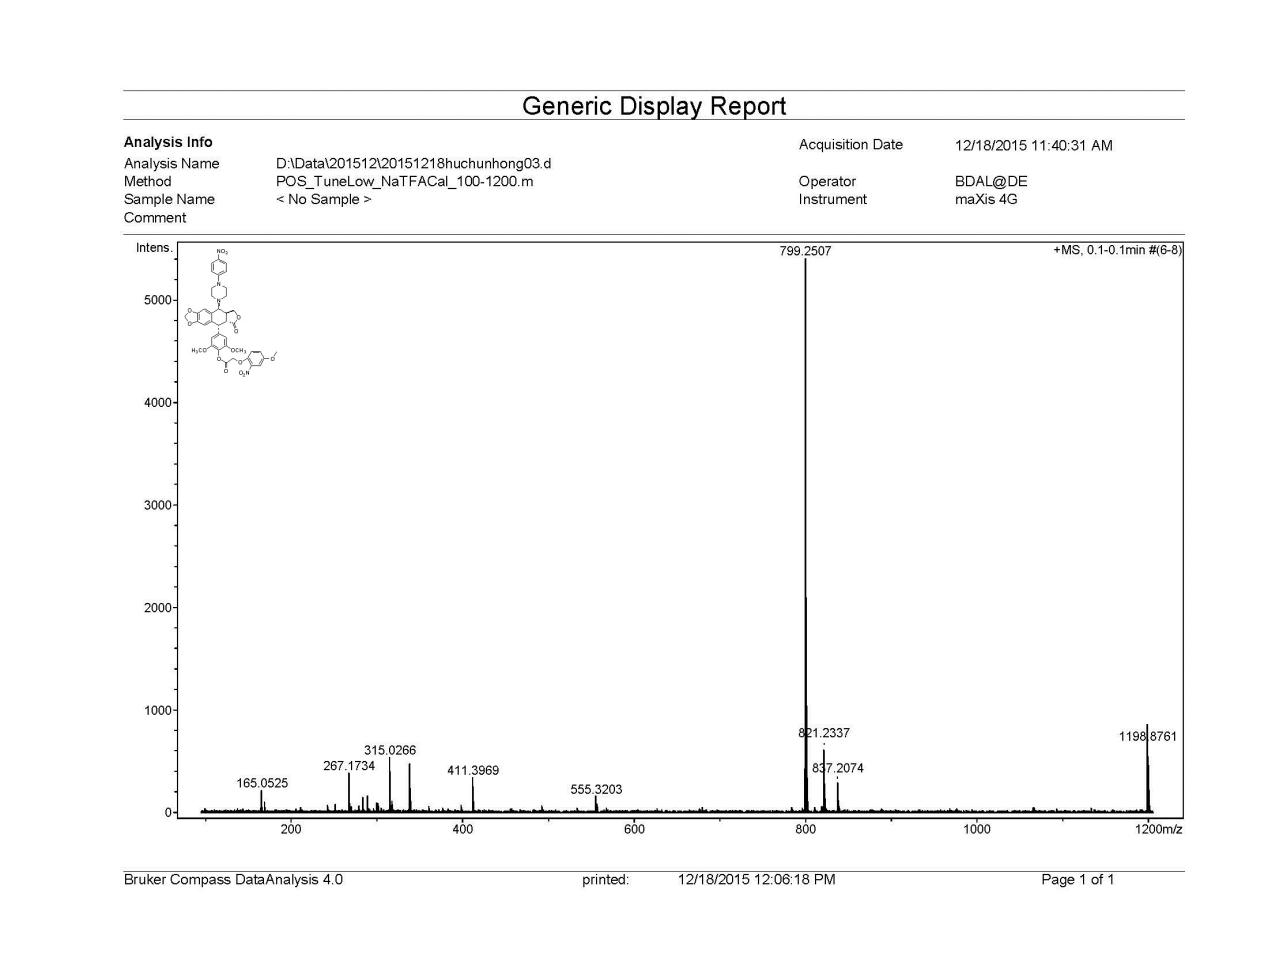


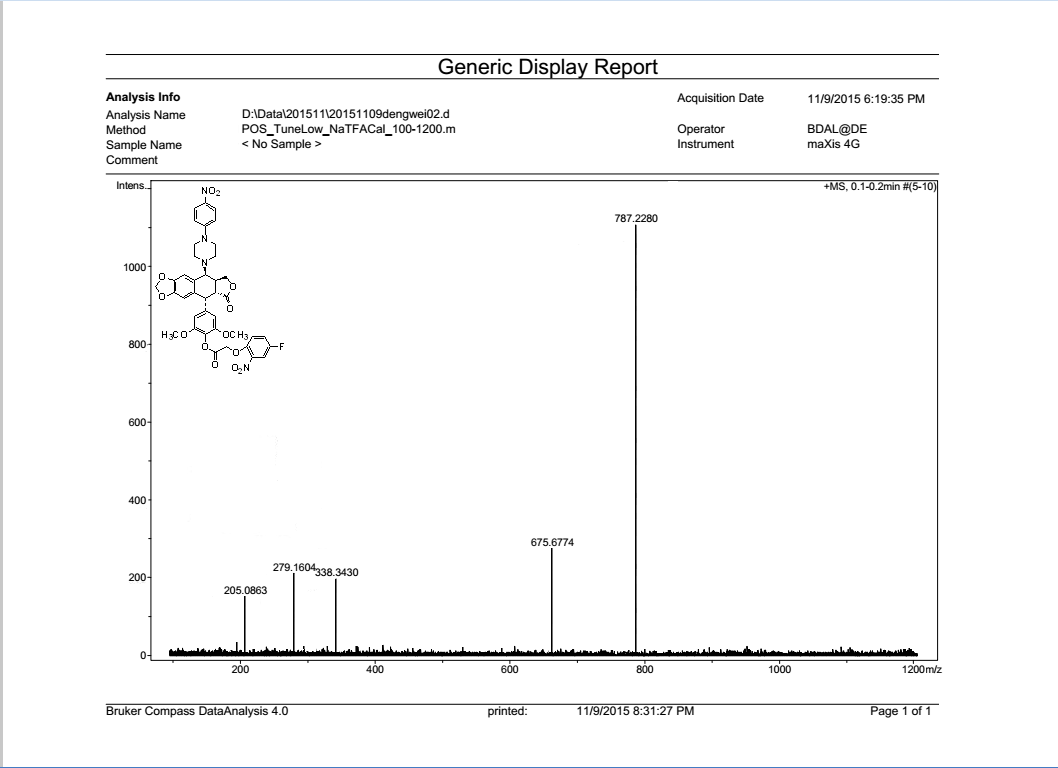


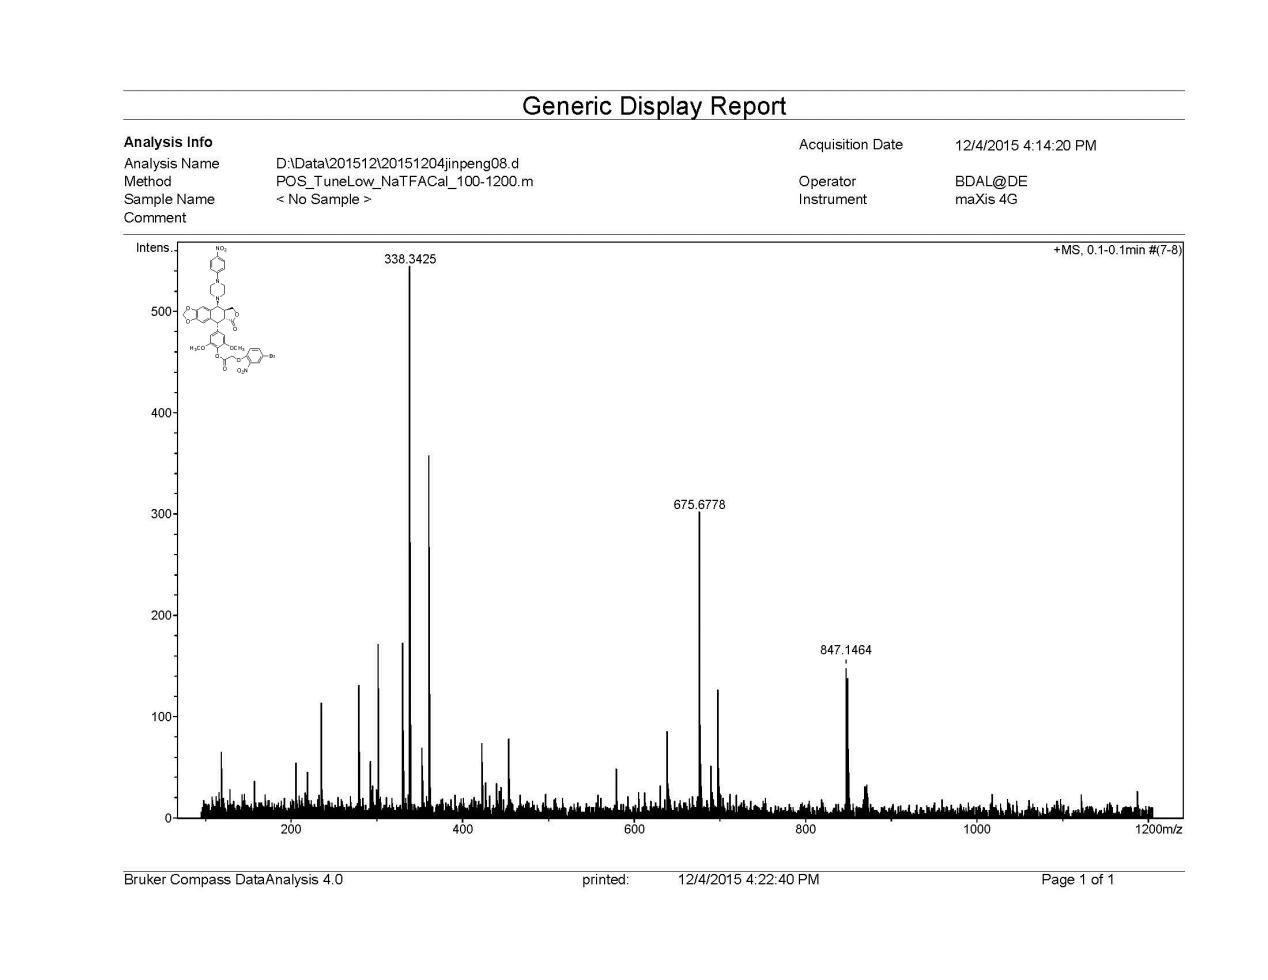


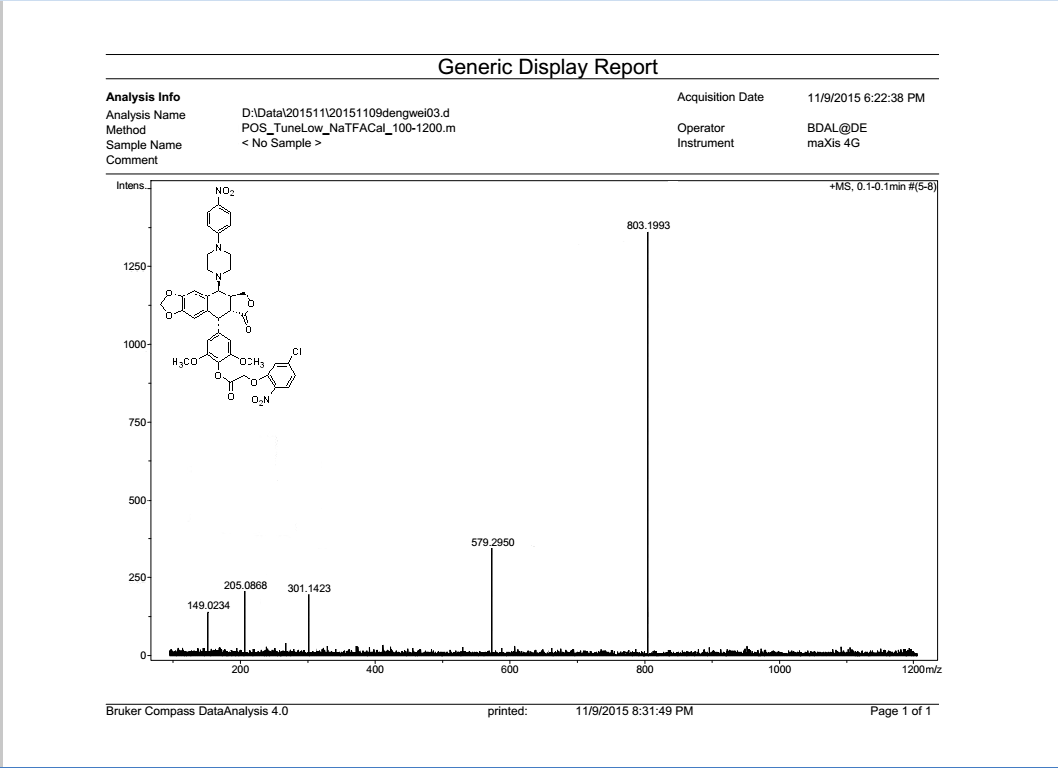


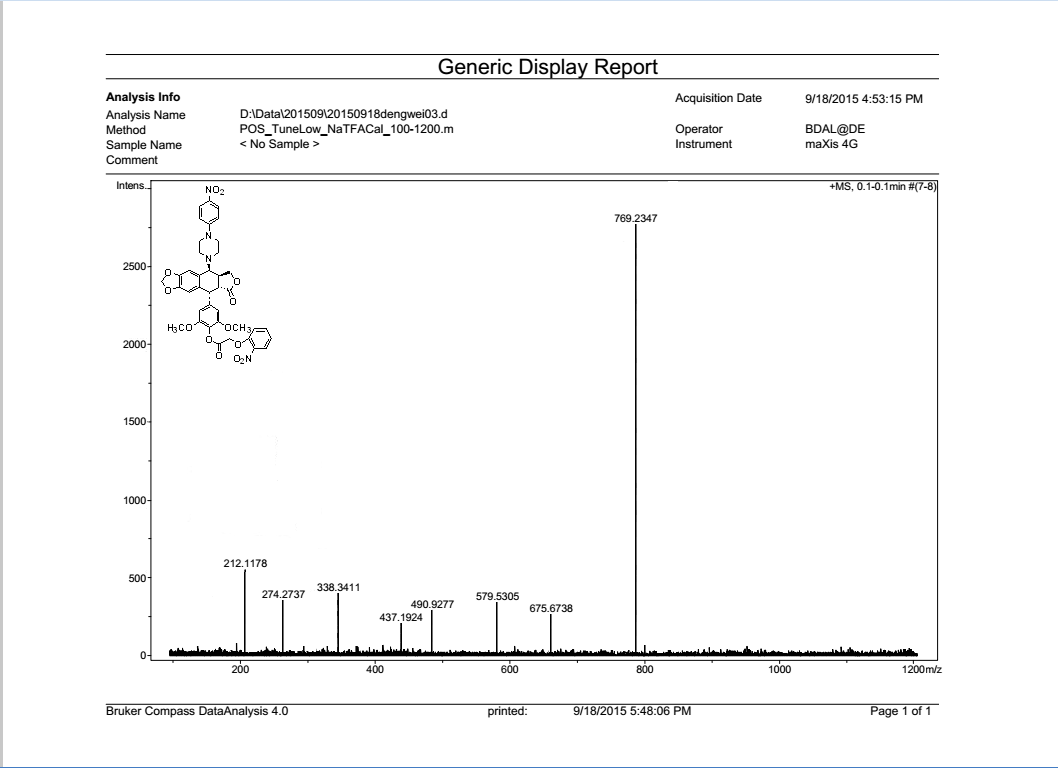


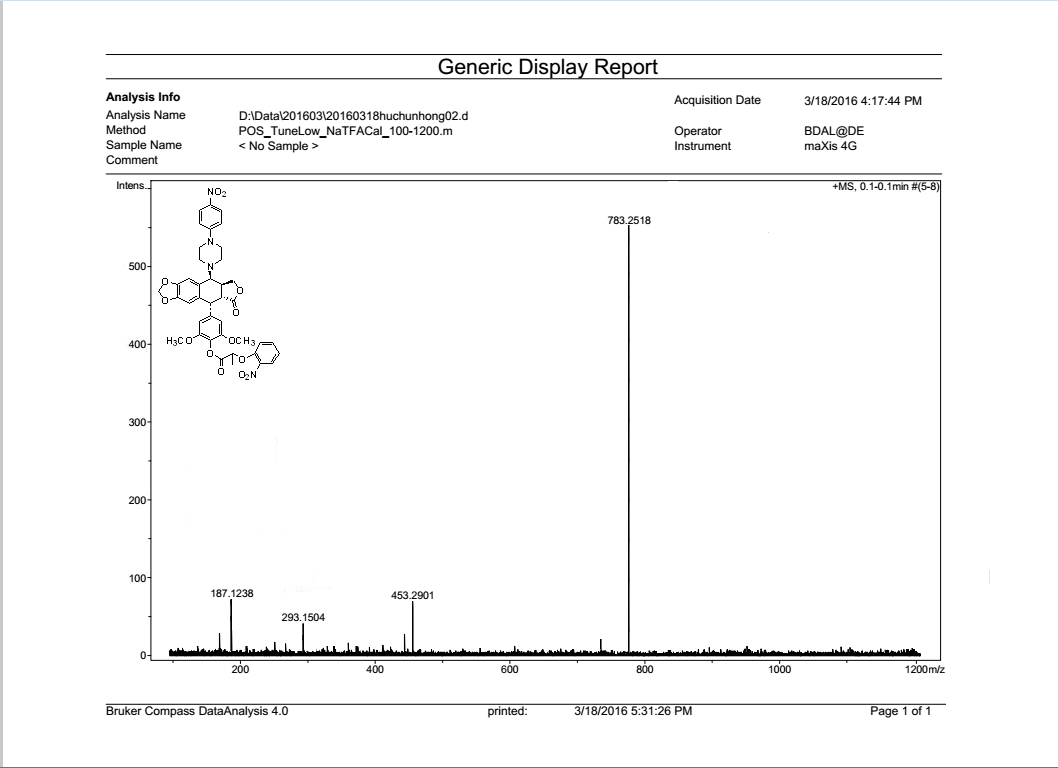


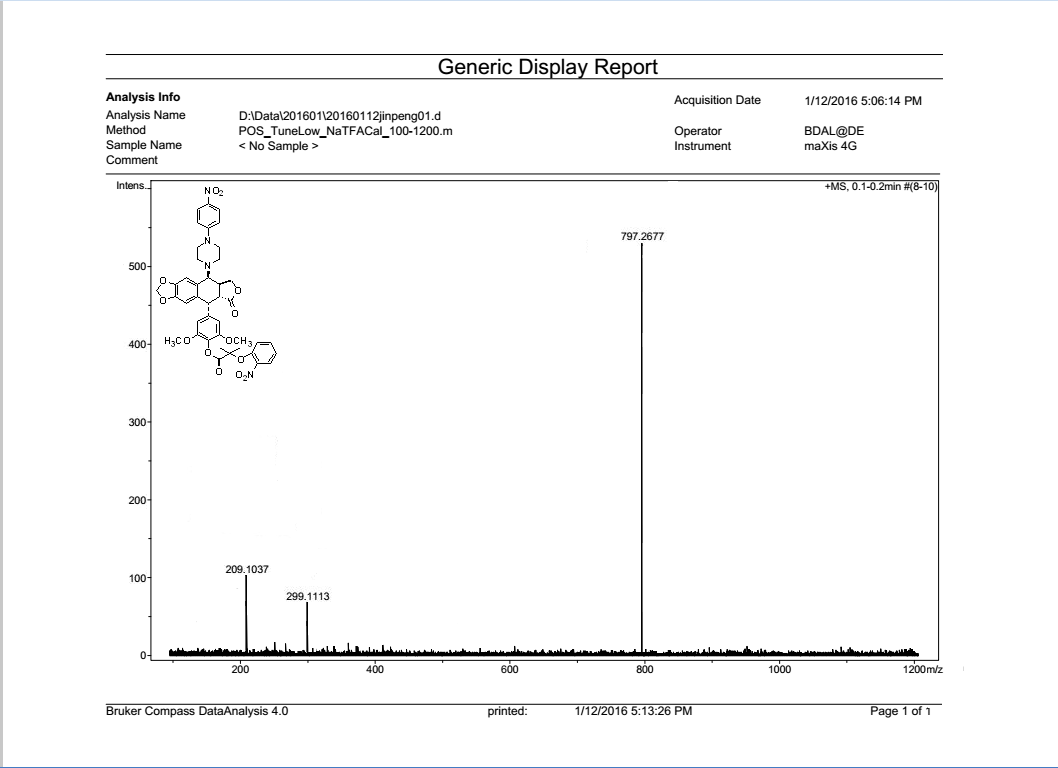


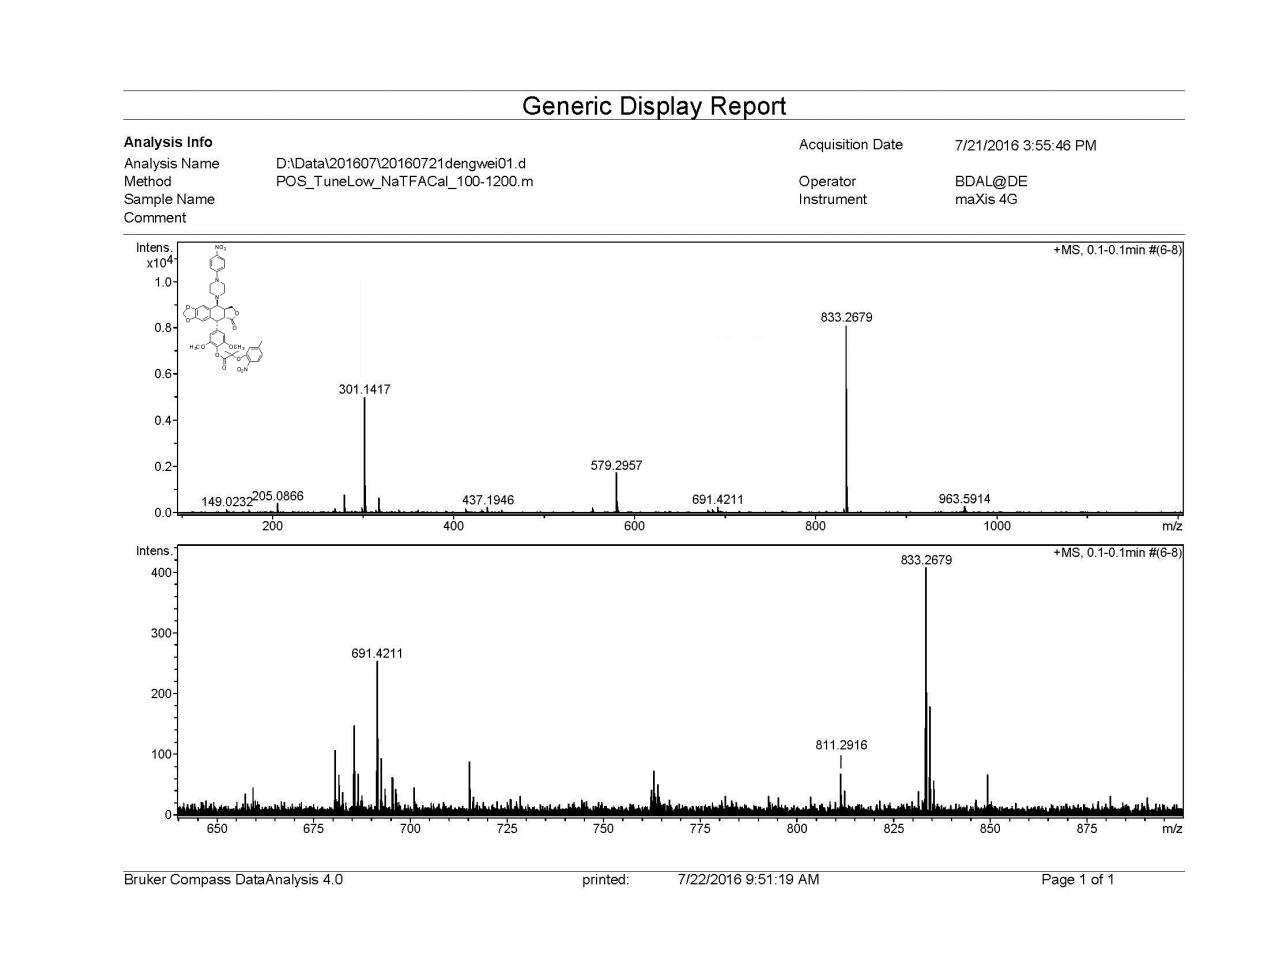

Supplement: Supplementary file 1 [file ab835193ec16f7fa600d48b7.docx]
